# Supplementary material
Source: PubMed Central journal article supplement (PMC4313423)
Supplement: Supp_Table1.pdf [file Supp_Table1.pdf]

## Supplementary Data

SUPPLEMENTARY TABLE S1. BLASTOCYST-FORMATION RATE AND *NANOG* AND *GATA4* COUNTS IN EMBRYOS TREATED WITH DIFFERENT SMALL MOLECULES

| <i>Conditions</i>     | <i>No. of two-cell embryos</i> | <i>Blastocyst-formation rate (%)</i> | <i>No. of embryos stained</i> | <i>Nanog</i>                    | <i>Gata4</i>                |
|-----------------------|--------------------------------|--------------------------------------|-------------------------------|---------------------------------|-----------------------------|
| Control               | 27                             | 92.59                                | 22                            | (8.27 ± 3.02) <sup>a</sup>      | (10.09 ± 2.74)              |
| SB431542 (10 μM)      | 40                             | 90                                   | 23                            | (12.60 ± 4.83) <sup>a,b,c</sup> | (7.52 ± 3.82)               |
| Forskolin (10 μM)     | 38                             | 78.94                                | 25                            | (8.56 ± 2.51) <sup>b</sup>      | (7.36 ± 4.36)               |
| LIF (1000 U/mL)       | 40                             | 85                                   | 21                            | (8.23 ± 2.48) <sup>c</sup>      | (8.23 ± 4.43)               |
| Control               | 30                             | 83.33                                | 23                            | (8.52 ± 2.59) <sup>a</sup>      | (10.82 ± 4.08) <sup>b</sup> |
| BMP4                  | 30                             | 90                                   | 25                            | (7 ± 2.17) <sup>a</sup>         | (7.24 ± 3.52) <sup>b</sup>  |
| Control               | 29                             | 93.10                                | 24                            | (8.33 ± 1.68) <sup>a</sup>      | (12.83 ± 3.62) <sup>b</sup> |
| Kenpaullone           | 29                             | 89.65                                | 21                            | (5.95 ± 2.81) <sup>a</sup>      | (8.14 ± 3.45) <sup>b</sup>  |
| Control               | 38                             | 94.74                                | 21                            | (9.048 ± 3.17) <sup>a,b</sup>   | 9.38 ± 3.528                |
| 0.1% DMSO             | 28                             | 89.29                                | 24                            | (8.042 ± 3.169) <sup>c,d</sup>  | 10.208 ± 3.551              |
| Sb431542 (SB) (10 μM) | 35                             | 91.43                                | 23                            | (14.0 ± 4.452) <sup>a,c</sup>   | 12.087 ± 5.143              |
| A-83-01 (1 μM)        | 29                             | 86.21                                | 18                            | (12.5 ± 3.222) <sup>b,d</sup>   | 9.944 ± 4.080               |

Values with same superscript (within a same group) show significant difference.  $P < 0.05$  considered significant. LIF, leukemia inhibitor factor; BMP, bone morphogenetic protein; DMSO, dimethyl sulfoxide.
