# Supplementary material
Source: PubMed Central journal article supplement (PMC4313423)
Supplement: Supp_Table2.pdf [file Supp_Table2.pdf]

SUPPLEMENTARY TABLE S2. BLASTOCYST-FORMATION RATE AND *NANOG* AND *GATA4* COUNTS  
IN EMBRYOS TREATED WITH DIFFERENT DOSES OF DIFFERENT MOLECULES

| Groups                  | No. of two-cell embryos | Blastocyst-formation rate (%) | No. of stained embryos | <i>Nanog</i>                   | <i>Gata4</i>                   |
|-------------------------|-------------------------|-------------------------------|------------------------|--------------------------------|--------------------------------|
| SB431542 dose response  |                         |                               |                        |                                |                                |
| Control                 | 31                      | 93.54                         | 24                     | (9.08 ± 3.32) <sup>a,b,c</sup> | (11 ± 4.28) <sup>g</sup>       |
| 5 μM SB                 | 31                      | 83.87                         | 22                     | (14.09 ± 4.19) <sup>a</sup>    | (9.3 ± 3.47)                   |
| 10 μM SB                | 31                      | 90.32                         | 24                     | (13.75 ± 3.13) <sup>b</sup>    | (8.83 ± 2.16)                  |
| 20 μM SB                | 31                      | 96.77                         | 25                     | (13.04 ± 4.03) <sup>c</sup>    | (7.88 ± 2.48) <sup>g</sup>     |
| Activin A dose response |                         |                               |                        |                                |                                |
| Control                 | 31                      | 90.32                         | 28                     | (8.25 ± 3.98) <sup>a,b</sup>   | 6.9 ± 3.64                     |
| 10 ng/mL                | 27                      | 81.48                         | 21                     | 6.47 ± 3.108                   | 8.42 ± 2.90                    |
| 25 ng/mL                | 27                      | 85.18                         | 25                     | (5.36 ± 2.21) <sup>a</sup>     | 6 ± 3.18                       |
| 100 ng/mL               | 27                      | 85.18                         | 23                     | (5.08 ± 2.50) <sup>b</sup>     | 6.43 ± 3.59                    |
| LIF dose response       |                         |                               |                        |                                |                                |
| Control                 | 33                      | 84.84                         | 26                     | 7.11 ± 3.21                    | (7.11 ± 3.24) <sup>a</sup>     |
| 100 U/mL                | 30                      | 80                            | 20                     | 6.35 ± 2.66                    | 8.7 ± 4.06                     |
| 2,000 U/mL              | 30                      | 90                            | 22                     | 6.09 ± 2.42                    | 9.81 ± 3.87                    |
| 3,000 U/mL              | 30                      | 80                            | 23                     | 8.043 ± 2.09                   | (11.52 ± 3.75) <sup>a</sup>    |
| Forskolin dose response |                         |                               |                        |                                |                                |
| Control                 | 30                      | 93.33                         | 26                     | 7.11 ± 3.21                    | (7.11 ± 3.24) <sup>a,b</sup>   |
| 5 μM                    | 30                      | 90                            | 24                     | 7.5 ± 2.43                     | (9.29 ± 2.8) <sup>a,c,d</sup>  |
| 30 μM                   | 30                      | 80                            | 21                     | 6.61 ± 2.13                    | 6.85 ± 3.17) <sup>c,e</sup>    |
| 50 μM                   | 30                      | 80                            | 17                     | 7.11 ± 2.95                    | (2.94 ± 2.04) <sup>b,d,e</sup> |
| DMSO dose response      |                         |                               |                        |                                |                                |
| Control                 | 51                      | 86.27                         | 41                     | (9.58 ± 3.10) <sup>a</sup>     | (9.36 ± 4.37) <sup>b,c,d</sup> |
| 0.1% DMSO               | 42                      | 88.09                         | 36                     | 8.02 ± 3.14                    | (8.75 ± 3.56) <sup>e,f</sup>   |
| 0.2% DMSO               | 42                      | 90.47                         | 34                     | 8.52 ± 2.86                    | (7.79 ± 4.31) <sup>g</sup>     |
| 0.3% DMSO               | 42                      | 88.09                         | 29                     | 7.55 ± 3.43                    | (6.79 ± 3.55) <sup>b</sup>     |
| 0.5% DMSO               | 46                      | 89.13                         | 38                     | (7.36 ± 3.27) <sup>a</sup>     | (5.6 ± 3.38) <sup>c,e</sup>    |
| 1% DMSO                 | 40                      | 20                            | 8                      | 9.87 ± 4.51                    | (2.62 ± 2.26) <sup>d,f,g</sup> |

Values with same superscript (within a same group) show significant difference.  $P < 0.05$  considered significant.
