# Supplementary material
Source: PubMed Central journal article supplement (PMC4313423)
Supplement: Supp_Table3.pdf [file Supp_Table3.pdf]

SUPPLEMENTARY TABLE S3. BLASTOCYST-FORMATION RATE AND *NANOG*- AND *GATA4*-POSITIVE CELLS  
(STAGE-SPECIFIC INHIBITION OF TRANSFORMING GROWTH FACTOR  $\beta$  PATHWAY WITH SB)

| <i>Conditions</i>                    | <i>No. of two-cell embryos</i> | <i>Blastocyst-formation rate (%)</i> | <i>No. of embryos stained</i> | <i>Nanog</i>                            | <i>Gata4</i>                          |
|--------------------------------------|--------------------------------|--------------------------------------|-------------------------------|-----------------------------------------|---------------------------------------|
| <b>5 <math>\mu</math>M SB421542</b>  |                                |                                      |                               |                                         |                                       |
| Control                              | 54                             | 87.03                                | 40                            | (8.80 $\pm$ 2.68) <sup>a,b,c</sup>      | (10.90 $\pm$ 3.73)                    |
| DMSO Control                         | 19                             | 73.68                                | 13                            | (8.30 $\pm$ 2.95) <sup>d,e,f</sup>      | (10.00 $\pm$ 4.84)                    |
| Two-cell onward                      | 48                             | 91.66                                | 41                            | (13.19 $\pm$ 3.32) <sup>a,d</sup>       | (9.63 $\pm$ 4.59)                     |
| Four-cell onward                     | 48                             | 93.75                                | 40                            | (12.15 $\pm$ 3.60) <sup>b,f,g</sup>     | (9.72 $\pm$ 4.29) <sup>i</sup>        |
| Morula onward                        | 49                             | 83.67                                | 35                            | (14.57 $\pm$ 4.32) <sup>c,e,g,h</sup>   | 10.94 $\pm$ 4.31                      |
| Early blastocyst onward              | 15                             | 100                                  | 14                            | (10.64 $\pm$ 1.94) <sup>h</sup>         | (12.85 $\pm$ 4.92) <sup>i</sup>       |
| <b>10 <math>\mu</math>M SB421542</b> |                                |                                      |                               |                                         |                                       |
| Control                              | 40                             | 85                                   | 26                            | (9.42 $\pm$ 2.61) <sup>a,b,c</sup>      | 10.42 $\pm$ 4.13                      |
| DMSO Control                         | 14                             | 85.71                                | 5                             | (6.6 $\pm$ 3.50) <sup>d,e,f</sup>       | 7.2 $\pm$ 2.16                        |
| Two-cell onward                      | 42                             | 85.71                                | 30                            | (12.03 $\pm$ 2.93) <sup>a,d,g</sup>     | 8.03 $\pm$ 2.91                       |
| Four-cell onward                     | 42                             | 92.85                                | 29                            | (13.24 $\pm$ 4.05) <sup>b,e,h</sup>     | 7.86 $\pm$ 2.81                       |
| Morula onward                        | 44                             | 88.63                                | 32                            | (12.93 $\pm$ 3.88) <sup>c,f,i</sup>     | 8.40 $\pm$ 3.99                       |
| Early blastocyst onward              | 14                             | 92.85                                | 10                            | (8.3 $\pm$ 2.62) <sup>g,h,i</sup>       | 7.7 $\pm$ 2.16                        |
| <b>20 <math>\mu</math>M SB421542</b> |                                |                                      |                               |                                         |                                       |
| Control                              | 86                             | 87.20                                | 69                            | (8.76 $\pm$ 3.12) <sup>a,b,c</sup>      | (9.89 $\pm$ 4.81) <sup>g</sup>        |
| DMSO Control                         | 25                             | 80                                   | 18                            | (8.72 $\pm$ 3.96) <sup>d</sup>          | (7.00 $\pm$ 3.39) <sup>h</sup>        |
| Two-cell onward                      | 68                             | 98.52                                | 60                            | (11.13 $\pm$ 3.80) <sup>a,e</sup>       | (4.80 $\pm$ 3.24) <sup>g,i,j,k</sup>  |
| Four-cell onward                     | 68                             | 89.70                                | 55                            | (10.76 $\pm$ 3.69) <sup>b,f</sup>       | (8.09 $\pm$ 3.85) <sup>i,l</sup>      |
| Morula onward                        | 74                             | 91.89                                | 58                            | (13.56 $\pm$ 4.30) <sup>c,d,e,f,g</sup> | (8.62 $\pm$ 3.97) <sup>j,m</sup>      |
| Early blastocyst onward              | 26                             | 96.15                                | 24                            | (11.00 $\pm$ 2.43) <sup>g</sup>         | (11.45 $\pm$ 4.45) <sup>h,k,l,m</sup> |

Values with same superscript (within a same group) show significant difference.  $P < 0.05$  considered significant.
