# Supplementary material
Source: PubMed Central journal article supplement (PMC4313423)
Supplement: Supp_Table4.pdf [file Supp_Table4.pdf]

SUPPLEMENTARY TABLE S4. BLASTOCYST-FORMATION RATE AND *NANOG*- AND *GATA4*-POSITIVE CELLS IN EMBRYOS CULTURED IN 2i+SB FROM TWO-CELL TO EXPANDED BLASTOCYST STAGE

| <i>Conditions</i>                    | <i>No. of two-cell embryos</i> | <i>Blastocyst-formation rate (%)</i> | <i>No. of embryos stained</i> | <i>Nanog</i>                      | <i>Gata4</i>                   |
|--------------------------------------|--------------------------------|--------------------------------------|-------------------------------|-----------------------------------|--------------------------------|
| Control                              | 60                             | 86.66                                | 26                            | (9.57 ± 3.87) <sup>a,b,c</sup>    | (7.19 ± 3.82) <sup>i</sup>     |
| DMSO control                         | 51                             | 98.03                                | 38                            | (8.5 ± 3.79) <sup>d,e,f</sup>     | (8.5 ± 3.75) <sup>j</sup>      |
| 2i (PD—1 μM, CH—3 μM)                | 51                             | 100                                  | 34                            | (13.35 ± 4.32) <sup>a,d,g</sup>   | (7.23 ± 4.08) <sup>k</sup>     |
| SB (10 μM)                           | 55                             | 90.90                                | 35                            | (12.88 ± 3.55) <sup>b,e,h</sup>   | (6.14 ± 3.80)                  |
| 2i + SB (PD—1 μM, CH—3 μM, SB—10 μM) | 51                             | 98.03                                | 34                            | (19.29 ± 5.03) <sup>c,f,g,h</sup> | (4.05 ± 3.77) <sup>i,j,k</sup> |

Values with same superscript show significant difference.  $P < 0.05$  considered significant.
