# Supplementary material
Source: PubMed Central journal article supplement (PMC4313423)
Supplement: Supp_Table5.pdf [file Supp_Table5.pdf]

SUPPLEMENTARY TABLE S5. BLASTOCYST-FORMATION RATE AND *NANOG*- AND *GATA4*-POSITIVE CELLS  
IN PARTHENOGENETIC AND NATURALLY FERTILIZED EMBRYOS CULTURED IN 2I  
FROM MORULA TO EXPANDED BLASTOCYST STAGE

| <i>Conditions</i>            | <i>No. of two-cell embryos</i> | <i>Blastocyst-formation rate (%)</i> | <i>No. of embryos stained</i> | <i>Nanog</i> | <i>Gata4</i>              |
|------------------------------|--------------------------------|--------------------------------------|-------------------------------|--------------|---------------------------|
| Parthenogenetic embryos      |                                |                                      |                               |              |                           |
| Control                      | 12                             | 91.66                                | 10                            | 9.00±5.14    | (11.5±4.06)               |
| 2i                           | 12                             | 83.33                                | 9                             | 13.55±6.80   | (6.33±6.65)               |
| Naturally fertilized embryos |                                |                                      |                               |              |                           |
| Control                      | 13                             | 100                                  | 11                            | 9.63±2.58    | (11.54±3.88) <sup>a</sup> |
| 2i                           | 13                             | 100                                  | 11                            | 12.00±6.97   | (6.90±4.11) <sup>a</sup>  |

Values with same superscript show significant difference.  $P < 0.05$  considered significant.
