# Supplementary material
Source: PubMed Central journal article supplement (PMC4313423)
Supplement: Supp_Table6.pdf [file Supp_Table6.pdf]

SUPPLEMENTARY TABLE S6. BLASTOCYST-FORMATION RATE AND *NANOG*- AND *GATA4*-POSITIVE CELLS IN IN VIVO AND IN VITRO EIGHT-CELL EMBRYOS EXPOSED TO 2i

| <i>Conditions</i>   | <i>No. of eight-cell embryos</i> | <i>Blastocyst-formation rate (%)</i> | <i>No. of embryos stained</i> | <i>Nanog</i>                | <i>Gata4</i>                |
|---------------------|----------------------------------|--------------------------------------|-------------------------------|-----------------------------|-----------------------------|
| B6D2F1_E2.5_Control | 3                                | 33.33                                | 0                             | —                           | —                           |
| B6D2F1_E2.5_2i      | 3                                | 100                                  | 3                             | 16.66 ± 5.50                | 14.33 ± 5.03                |
| B6D2F1_E0.5_control | 14                               | 100                                  | 14                            | (10.35 ± 3.02) <sup>a</sup> | (14.42 ± 4.71) <sup>b</sup> |
| B6D2F1_E0.5_2i      | 15                               | 93.33                                | 14                            | (17.07 ± 8.00) <sup>a</sup> | (9.15 ± 5.35) <sup>b</sup>  |
| 129Sv_E0.5_control  | 3                                | 100                                  | 3                             | 10 ± 2.64                   | 6.66 ± 3.05                 |
| 129Sv_E0.5_2i       | 3                                | 100                                  | 3                             | 11.5 ± 0.707                | 10 ± 2.82                   |

Values with same superscript (within a same group) show significant difference.  $P < 0.05$  considered significant.
