# Supplementary material
Source: PubMed Central journal article supplement (PMC4313423)
Supplement: Supp_Table7.pdf [file Supp_Table7.pdf]

SUPPLEMENTARY TABLE S7. BLASTOCYST-FORMATION RATE AND *NANOG*- AND *GATA4*-POSITIVE CELLS  
IN EARLY AND LATE BLASTOCYSTS

| <i>Conditions</i>                                                   | <i>No. of two-cell embryos</i> | <i>Blastocyst-formation rate (%)</i> | <i>No. of embryos stained</i> | <i>Nanog</i> | <i>Gata4</i> |
|---------------------------------------------------------------------|--------------------------------|--------------------------------------|-------------------------------|--------------|--------------|
| 75 h postcollection (day 4) (blastocysts in early cavitation stage) |                                |                                      |                               |              |              |
| Control                                                             | 11                             | 90.9                                 | 9                             | 39.556±8.323 | 0            |
| 2i                                                                  | 13                             | 92.3                                 | 11                            | 41.185±7.201 | 0            |
| 90 h postcollection (day 5)                                         |                                |                                      |                               |              |              |
| Control                                                             | 8                              | 87.5                                 | 6                             | 26.6±1.817   | 6.833±6.463  |
| 2i                                                                  | 6                              | 83.33                                | 5                             | 26.66±5.820  | 4.6±2.793    |
| 100 h postcollection (day 5) (fully expanded blastocysts)           |                                |                                      |                               |              |              |
| Control                                                             | 8                              | 87.5                                 | 7                             | 17.428±9.710 | 13.857±9.317 |
| 2i                                                                  | 7                              | 85.71                                | 6                             | 24.166±9.517 | 8±7.589      |
